# Supplementary material for: S6K1 phosphorylation-dependent degradation of Mxi1 by β-Trcp ubiquitin ligase promotes Myc activation and radioresistance in lung cancer
Source: PubMed Central journal article supplement — Theranostics. 2018 Feb 2;8(5):1286–300. doi: 10.7150/thno.22552 (PMC5835936; doi:10.7150/thno.22552), 2018-02-02

**Figure S1.** Fluctuation of the levels of Mxi1 during cell cycle progression. HeLa cells were synchronized in S phase with hydroxyurea (HU) for 24 h and then were released. Cells were harvested at indicated time points and subjected to immunoblot analyses using indicated antibodies (n=3).

**Figure S2.** Knockdown of S6K1 but not RSK stabilizes endogenous Mxi1. HeLa cells were transfected with indicated siRNAs for 48 h and then analyzed by Western blotting as indicated (n=3). The ratio shows relative Mxi1 protein expression normalized for GAPDH (control, set at 1).

**Figure S3.** The mRNA levels of Mxi1 were analyzed by Real time-PCR in A549 and H1299 cells stably expressing wild-type or mutant Mxi1. n.s. indicates no statistically significant difference ( $P > 0.05$ ). (n=3).

**Figure S4.** Immunoblots showing levels of S6K1, p-S6K1,  $\beta$ -Tcrp1, Myc and Max in lysates prepared from five different lung cancer cell lines. Cells were harvested and lysates were blotted with indicated antibodies (n=3).

**Figure S5. A.** Alignment of S6K1 and  $\beta$ -Tcrp phosphodegron motifs in four Mad family members (Mad1, Mxi1, Mad3 and Mad4) from human. **B.** HEK293T cells were transfected with the indicated constructs for 24h. Cells were collected and then analyzed with indicated antibodies (n=3). The ratio shows relative Mad family protein expression

normalized for GAPDH (control, set at 1)



**Figure S2.**

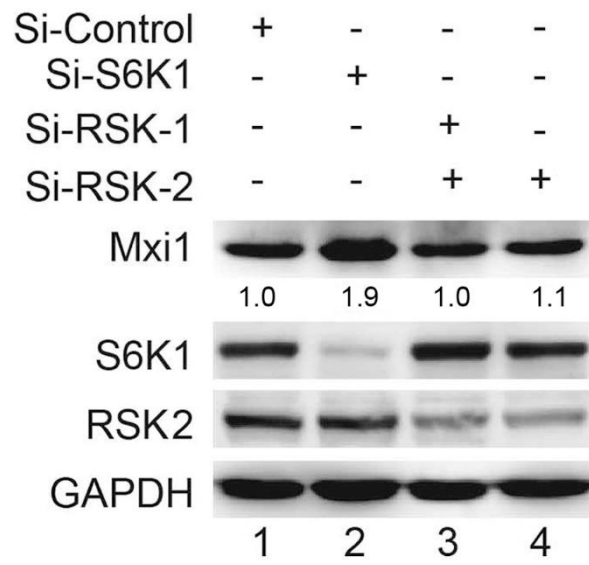

**Figure S3.**

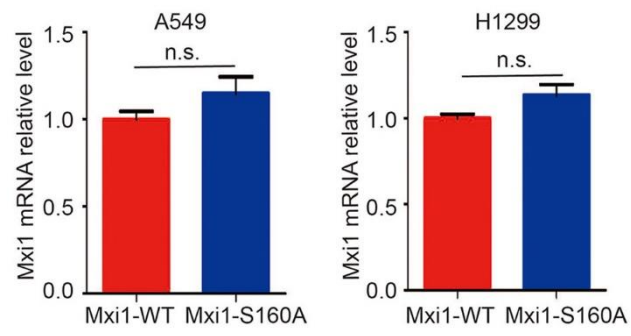

**Figure S4.**

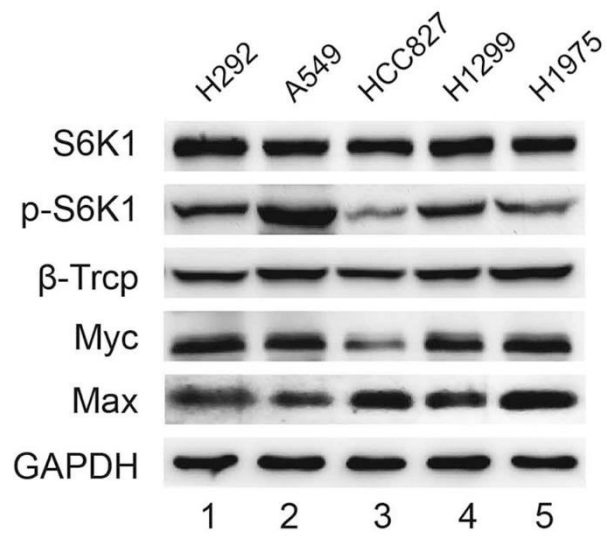

**Figure S5.**

**A**

Mad1 136-L G I E R I R M D S I G S T V S S E -153  
 Mxi1 151-Q E M E R I R M D S I G S T I S S D -168  
 Mad3 144-A E R E R L R A D S L D S S G L S S -161  
 Mad4 136-Q S V E R V R T D S T G S A V S T D -153  
 S6K1 binding motif R X R X X S  
 β-Trcp binding motif D S G X X S / T

**B**

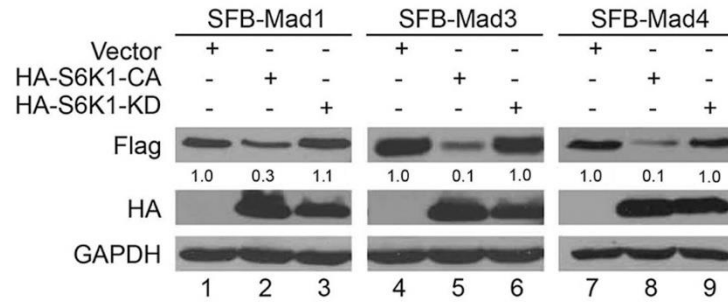

Supplement: thnov08p1286s1.pdf [file thnov08p1286s1.pdf]
